# Supplementary material
Source: PubMed Central journal article supplement (PMC3811214)
Supplement: AEM.01626-13_zam020134764so1.pdf [file AEM.01626-13_zam020134764so1.pdf]

Supplemental Figure 1. Heat map of the number of detections of *Cryptosporidium* species/genotypes assigned to broad host classes, the detection of *Bacteroidales* source markers, DNA and RNA virus detections (with associated hosts), and coliphage host marker detections for all sites in 10 day intervals through time from 2004 to 2010 for AAD. A/w, associated with.

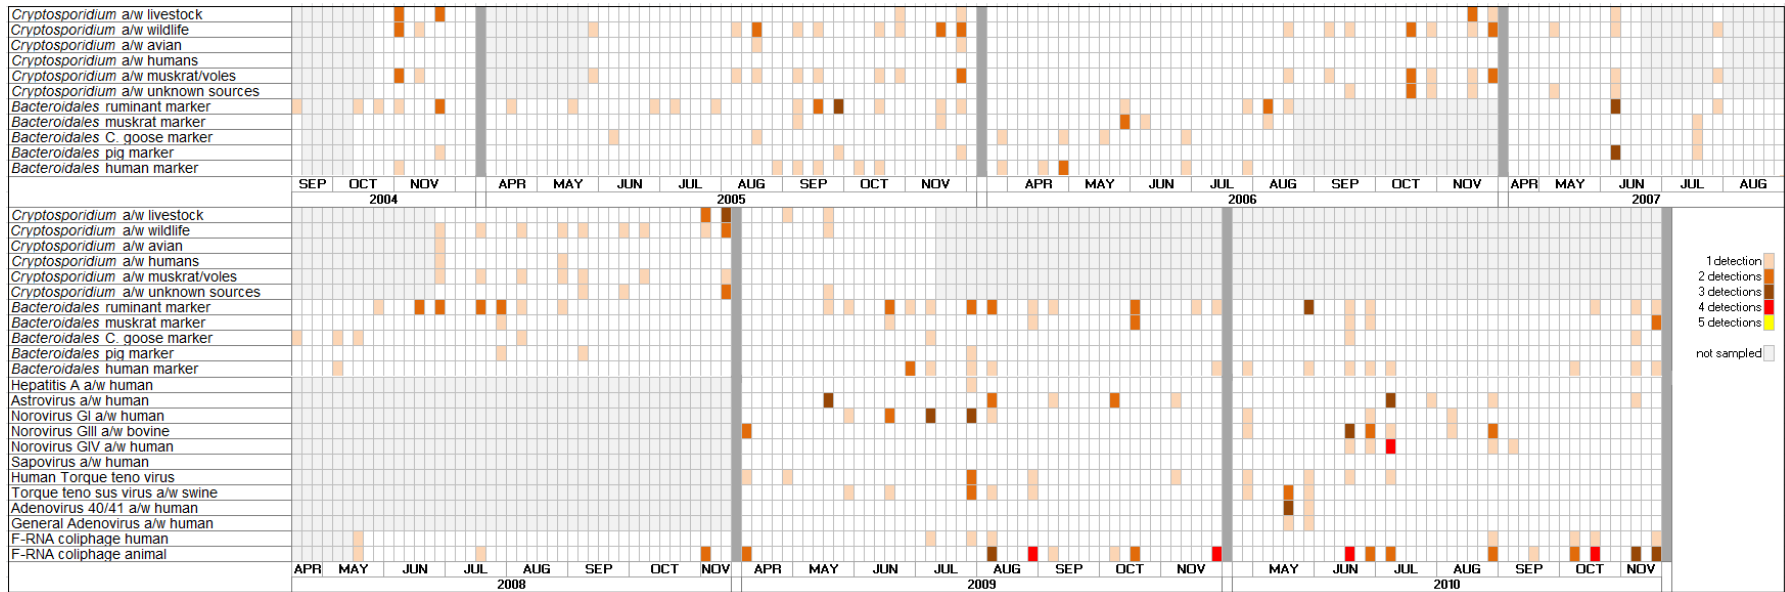

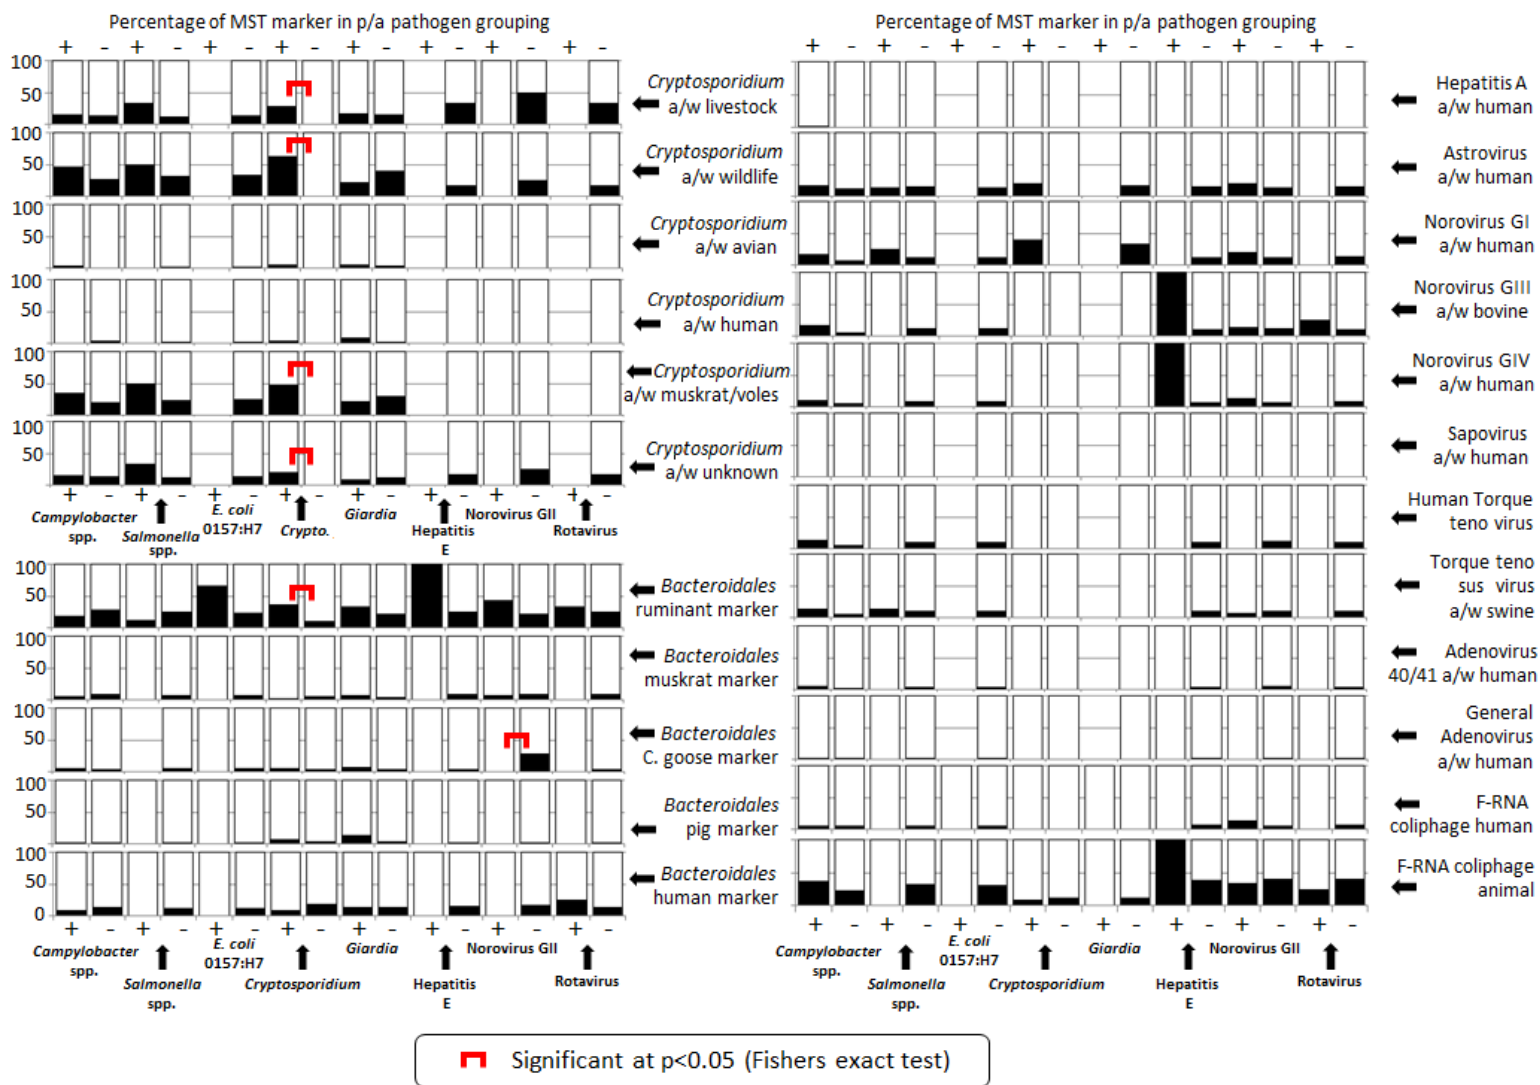

Supplemental Figure 2. Samples of host markers (y-axis) when a pathogen is present or absent (x-axis) using AAD. Significant difference in occurrence as observed by Fisher's exact test ( $p < 0.05$ ). A/w, associated with.

Supplementary Table 1A. Number of TCD collected at RCA<sub>in</sub>; RCA<sub>out</sub>\URCA<sub>in</sub>; and URCA<sub>out</sub>. And number of TCD collected for parasite analysis collected at RCA<sub>in</sub>; URCA<sub>out</sub>. A/w, associated with.

|                                            |                                        | All data | spring | summer | fall | high | low | no flow |
|--------------------------------------------|----------------------------------------|----------|--------|--------|------|------|-----|---------|
| Microbial source tracking end point        | Site                                   | N        | N      | N      | N    | N    | N   | N       |
| <i>Cryptosporidium</i> a/w livestock       | RCA <sub>in</sub>                      | 37       | 6      | 19     | 12   | 15   | 11  | 11      |
| <i>Cryptosporidium</i> a/w livestock       | URCA <sub>out</sub>                    | 37       | 6      | 19     | 12   | 15   | 11  | 11      |
| <i>Cryptosporidium</i> a/w wildlife        | RCA <sub>in</sub>                      | 37       | 6      | 19     | 12   | 15   | 11  | 11      |
| <i>Cryptosporidium</i> a/w wildlife        | URCA <sub>out</sub>                    | 37       | 6      | 19     | 12   | 15   | 11  | 11      |
| <i>Cryptosporidium</i> a/w avian           | RCA <sub>in</sub>                      | 37       | 6      | 19     | 12   | 15   | 11  | 11      |
| <i>Cryptosporidium</i> a/w avian           | URCA <sub>out</sub>                    | 37       | 6      | 19     | 12   | 15   | 11  | 11      |
| <i>Cryptosporidium</i> a/w humans          | RCA <sub>in</sub>                      | 37       | 6      | 19     | 12   | 15   | 11  | 11      |
| <i>Cryptosporidium</i> a/w humans          | URCA <sub>out</sub>                    | 37       | 6      | 19     | 12   | 15   | 11  | 11      |
| <i>Cryptosporidium</i> a/w muskrat/voles   | RCA <sub>in</sub>                      | 37       | 6      | 19     | 12   | 15   | 11  | 11      |
| <i>Cryptosporidium</i> a/w muskrat/voles   | URCA <sub>out</sub>                    | 37       | 6      | 19     | 12   | 15   | 11  | 11      |
| <i>Cryptosporidium</i> a/w unknown sources | RCA <sub>in</sub>                      | 37       | 6      | 19     | 12   | 15   | 11  | 11      |
| <i>Cryptosporidium</i> a/w unknown sources | URCA <sub>out</sub>                    | 37       | 6      | 19     | 12   | 15   | 11  | 11      |
| <i>Bacteroidales</i> ruminant marker       | RCA <sub>in</sub>                      | 64       | 26     | 23     | 15   | 26   | 27  | 11      |
| <i>Bacteroidales</i> ruminant marker       | RCA <sub>out</sub> \URCA <sub>in</sub> | 64       | 26     | 23     | 15   | 26   | 27  | 11      |
| <i>Bacteroidales</i> ruminant marker       | URCA <sub>out</sub>                    | 64       | 26     | 23     | 15   | 26   | 27  | 11      |
| <i>Bacteroidales</i> muskrat marker        | RCA <sub>in</sub>                      | 67       | 29     | 23     | 15   | 27   | 28  | 12      |
| <i>Bacteroidales</i> muskrat marker        | RCA <sub>out</sub> \URCA <sub>in</sub> | 67       | 29     | 23     | 15   | 27   | 28  | 12      |
| <i>Bacteroidales</i> muskrat marker        | URCA <sub>out</sub>                    | 67       | 29     | 23     | 15   | 27   | 28  | 12      |
| <i>Bacteroidales</i> C. goose marker       | RCA <sub>in</sub>                      | 67       | 29     | 23     | 15   | 27   | 28  | 12      |
| <i>Bacteroidales</i> C. goose marker       | RCA <sub>out</sub> \URCA <sub>in</sub> | 67       | 29     | 23     | 15   | 27   | 28  | 12      |
| <i>Bacteroidales</i> C. goose marker       | URCA <sub>out</sub>                    | 67       | 29     | 23     | 15   | 27   | 28  | 12      |
| <i>Bacteroidales</i> pig marker            | RCA <sub>in</sub>                      | 67       | 29     | 23     | 15   | 27   | 28  | 12      |
| <i>Bacteroidales</i> pig marker            | RCA <sub>out</sub> \URCA <sub>in</sub> | 67       | 29     | 23     | 15   | 27   | 28  | 12      |
| <i>Bacteroidales</i> pig marker            | URCA <sub>out</sub>                    | 67       | 29     | 23     | 15   | 27   | 28  | 12      |
| <i>Bacteroidales</i> human marker          | RCA <sub>in</sub>                      | 67       | 29     | 23     | 15   | 27   | 28  | 12      |
| <i>Bacteroidales</i> human marker          | RCA <sub>out</sub> \URCA <sub>in</sub> | 67       | 29     | 23     | 15   | 27   | 28  | 12      |
| <i>Bacteroidales</i> human marker          | URCA <sub>out</sub>                    | 67       | 29     | 23     | 15   | 27   | 28  | 12      |
| Hepatitis A a/w human                      | RCA <sub>in</sub>                      | 27       | 9      | 9      | 9    | 11   | 13  | 3       |
| Hepatitis A a/w human                      | RCA <sub>out</sub> \URCA <sub>in</sub> | 27       | 9      | 9      | 9    | 11   | 13  | 3       |
| Hepatitis A a/w human                      | URCA <sub>out</sub>                    | 27       | 9      | 9      | 9    | 11   | 13  | 3       |
| Astrovirus a/w human                       | RCA <sub>in</sub>                      | 27       | 9      | 9      | 9    | 11   | 13  | 3       |
| Astrovirus a/w human                       | RCA <sub>out</sub> \URCA <sub>in</sub> | 27       | 9      | 9      | 9    | 11   | 13  | 3       |
| Astrovirus a/w human                       | URCA <sub>out</sub>                    | 27       | 9      | 9      | 9    | 11   | 13  | 3       |
| Norovirus GI a/w human                     | RCA <sub>in</sub>                      | 27       | 9      | 9      | 9    | 11   | 13  | 3       |
| Norovirus GI a/w human                     | RCA <sub>out</sub> \URCA <sub>in</sub> | 27       | 9      | 9      | 9    | 11   | 13  | 3       |
| Norovirus GI a/w human                     | URCA <sub>out</sub>                    | 27       | 9      | 9      | 9    | 11   | 13  | 3       |
| Norovirus GIII a/w bovine                  | RCA <sub>in</sub>                      | 27       | 9      | 9      | 9    | 11   | 13  | 3       |
| Norovirus GIII a/w bovine                  | RCA <sub>out</sub> \URCA <sub>in</sub> | 27       | 9      | 9      | 9    | 11   | 13  | 3       |
| Norovirus GIII a/w bovine                  | URCA <sub>out</sub>                    | 27       | 9      | 9      | 9    | 11   | 13  | 3       |
| Norovirus GIV a/w human                    | RCA <sub>in</sub>                      | 27       | 9      | 9      | 9    | 11   | 13  | 3       |
| Norovirus GIV a/w human                    | RCA <sub>out</sub> \URCA <sub>in</sub> | 27       | 9      | 9      | 9    | 11   | 13  | 3       |
| Norovirus GIV a/w human                    | URCA <sub>out</sub>                    | 27       | 9      | 9      | 9    | 11   | 13  | 3       |
| Sapovirus a/w human                        | RCA <sub>in</sub>                      | 27       | 9      | 9      | 9    | 11   | 13  | 3       |
| Sapovirus a/w human                        | RCA <sub>out</sub> \URCA <sub>in</sub> | 27       | 9      | 9      | 9    | 11   | 13  | 3       |
| Sapovirus a/w human                        | URCA <sub>out</sub>                    | 27       | 9      | 9      | 9    | 11   | 13  | 3       |
| Human Torque teno virus                    | RCA <sub>in</sub>                      | 27       | 9      | 9      | 9    | 11   | 13  | 3       |
| Human Torque teno virus                    | RCA <sub>out</sub> \URCA <sub>in</sub> | 27       | 9      | 9      | 9    | 11   | 13  | 3       |
| Human Torque teno virus                    | URCA <sub>out</sub>                    | 27       | 9      | 9      | 9    | 11   | 13  | 3       |
| Torque teno sus virus a/w swine            | RCA <sub>in</sub>                      | 27       | 9      | 9      | 9    | 11   | 13  | 3       |
| Torque teno sus virus a/w swine            | RCA <sub>out</sub> \URCA <sub>in</sub> | 27       | 9      | 9      | 9    | 11   | 13  | 3       |
| Torque teno sus virus a/w swine            | URCA <sub>out</sub>                    | 27       | 9      | 9      | 9    | 11   | 13  | 3       |
| Adenovirus 40/41 a/w human                 | RCA <sub>in</sub>                      | 27       | 9      | 9      | 9    | 11   | 13  | 3       |

|                                     |                                        | All data | spring | summer | fall | high | low | no flow |
|-------------------------------------|----------------------------------------|----------|--------|--------|------|------|-----|---------|
| Microbial source tracking end point | Site                                   | N        | N      | N      | N    | N    | N   | N       |
| Adenovirus 40/41 a/w human          | RCA <sub>out</sub> \URCA <sub>in</sub> | 27       | 9      | 9      | 9    | 11   | 13  | 3       |
| Adenovirus 40/41 a/w human          | URCA <sub>out</sub>                    | 27       | 9      | 9      | 9    | 11   | 13  | 3       |
| General Adenovirus a/w human        | RCA <sub>in</sub>                      | 27       | 9      | 9      | 9    | 11   | 13  | 3       |
| General Adenovirus a/w human        | RCA <sub>out</sub> \URCA <sub>in</sub> | 27       | 9      | 9      | 9    | 11   | 13  | 3       |
| General Adenovirus a/w human        | URCA <sub>out</sub>                    | 27       | 9      | 9      | 9    | 11   | 13  | 3       |
| F-RNA coliphage human               | RCA <sub>in</sub>                      | 38       | 13     | 15     | 10   | 16   | 19  | 3       |
| F-RNA coliphage human               | RCA <sub>out</sub> \URCA <sub>in</sub> | 38       | 13     | 15     | 10   | 16   | 19  | 3       |
| F-RNA coliphage human               | URCA <sub>out</sub>                    | 38       | 13     | 15     | 10   | 16   | 19  | 3       |
| F-RNA coliphage animal              | RCA <sub>in</sub>                      | 38       | 13     | 15     | 10   | 16   | 19  | 3       |
| F-RNA coliphage animal              | RCA <sub>out</sub> \URCA <sub>in</sub> | 38       | 13     | 15     | 10   | 16   | 19  | 3       |
| F-RNA coliphage animal              | URCA <sub>out</sub>                    | 38       | 13     | 15     | 10   | 16   | 19  | 3       |

Supplementary Table 1B. Number of samples collected for AAD. A/w, associated with.

| Microbial source tracking end point        | Site                                   | All data | spring | summer | fall | high | low | no flow |
|--------------------------------------------|----------------------------------------|----------|--------|--------|------|------|-----|---------|
| <i>Cryptosporidium</i> a/w livestock       | RCA <sub>in</sub>                      | 40       | 7      | 19     | 14   | 15   | 11  | 14      |
| <i>Cryptosporidium</i> a/w livestock       | RCA <sub>out</sub>  URCA <sub>in</sub> | 8        | 0      | 6      | 2    | 4    | 4   | 0       |
| <i>Cryptosporidium</i> a/w livestock       | URCA <sub>mid</sub>                    | 0        | 0      | 0      | 0    | 0    | 0   | 0       |
| <i>Cryptosporidium</i> a/w livestock       | URCA <sub>out</sub>                    | 58       | 17     | 22     | 19   | 25   | 21  | 12      |
| <i>Cryptosporidium</i> a/w wildlife        | RCA <sub>in</sub>                      | 40       | 7      | 19     | 14   | 15   | 11  | 14      |
| <i>Cryptosporidium</i> a/w wildlife        | RCA <sub>out</sub>  URCA <sub>in</sub> | 8        | 0      | 6      | 2    | 4    | 4   | 0       |
| <i>Cryptosporidium</i> a/w wildlife        | URCA <sub>mid</sub>                    | 0        | 0      | 0      | 0    | 0    | 0   | 0       |
| <i>Cryptosporidium</i> a/w wildlife        | URCA <sub>out</sub>                    | 58       | 17     | 22     | 19   | 25   | 21  | 12      |
| <i>Cryptosporidium</i> a/w avian           | RCA <sub>in</sub>                      | 40       | 7      | 19     | 14   | 15   | 11  | 14      |
| <i>Cryptosporidium</i> a/w avian           | RCA <sub>out</sub>  URCA <sub>in</sub> | 8        | 0      | 6      | 2    | 4    | 4   | 0       |
| <i>Cryptosporidium</i> a/w avian           | URCA <sub>mid</sub>                    | 0        | 0      | 0      | 0    | 0    | 0   | 0       |
| <i>Cryptosporidium</i> a/w avian           | URCA <sub>out</sub>                    | 58       | 17     | 22     | 19   | 25   | 21  | 12      |
| <i>Cryptosporidium</i> a/w humans          | RCA <sub>in</sub>                      | 40       | 7      | 19     | 14   | 15   | 11  | 14      |
| <i>Cryptosporidium</i> a/w humans          | RCA <sub>out</sub>  URCA <sub>in</sub> | 8        | 0      | 6      | 2    | 4    | 4   | 0       |
| <i>Cryptosporidium</i> a/w humans          | URCA <sub>mid</sub>                    | 0        | 0      | 0      | 0    | 0    | 0   | 0       |
| <i>Cryptosporidium</i> a/w humans          | URCA <sub>out</sub>                    | 58       | 17     | 22     | 19   | 25   | 21  | 12      |
| <i>Cryptosporidium</i> a/w muskrat/voles   | RCA <sub>in</sub>                      | 40       | 7      | 19     | 14   | 15   | 11  | 14      |
| <i>Cryptosporidium</i> a/w muskrat/voles   | RCA <sub>out</sub>  URCA <sub>in</sub> | 8        | 0      | 6      | 2    | 4    | 4   | 0       |
| <i>Cryptosporidium</i> a/w muskrat/voles   | URCA <sub>mid</sub>                    | 0        | 0      | 0      | 0    | 0    | 0   | 0       |
| <i>Cryptosporidium</i> a/w muskrat/voles   | URCA <sub>out</sub>                    | 58       | 17     | 22     | 19   | 25   | 21  | 26      |
| <i>Cryptosporidium</i> a/w unknown sources | RCA <sub>in</sub>                      | 40       | 7      | 19     | 14   | 15   | 11  | 14      |
| <i>Cryptosporidium</i> a/w unknown sources | RCA <sub>out</sub>  URCA <sub>in</sub> | 8        | 0      | 6      | 2    | 4    | 4   | 0       |
| <i>Cryptosporidium</i> a/w unknown sources | URCA <sub>mid</sub>                    | 0        | 0      | 0      | 0    | 0    | 0   | 0       |
| <i>Cryptosporidium</i> a/w unknown sources | URCA <sub>out</sub>                    | 58       | 17     | 22     | 19   | 25   | 21  | 12      |
| <i>Bacteroidales</i> ruminant marker       | RCA <sub>in</sub>                      | 83       | 29     | 34     | 20   | 30   | 29  | 24      |
| <i>Bacteroidales</i> ruminant marker       | RCA <sub>out</sub>  URCA <sub>in</sub> | 68       | 28     | 25     | 15   | 28   | 29  | 11      |
| <i>Bacteroidales</i> ruminant marker       | URCA <sub>mid</sub>                    | 48       | 23     | 15     | 10   | 21   | 24  | 3       |
| <i>Bacteroidales</i> ruminant marker       | URCA <sub>out</sub>                    | 83       | 29     | 30     | 24   | 33   | 35  | 15      |
| <i>Bacteroidales</i> muskrat marker        | RCA <sub>in</sub>                      | 86       | 32     | 34     | 20   | 31   | 30  | 25      |
| <i>Bacteroidales</i> muskrat marker        | RCA <sub>out</sub>  URCA <sub>in</sub> | 71       | 31     | 25     | 15   | 29   | 30  | 12      |
| <i>Bacteroidales</i> muskrat marker        | URCA <sub>mid</sub>                    | 48       | 23     | 15     | 10   | 21   | 24  | 3       |
| <i>Bacteroidales</i> muskrat marker        | URCA <sub>out</sub>                    | 83       | 29     | 30     | 24   | 33   | 35  | 15      |
| <i>Bacteroidales</i> C. goose marker       | RCA <sub>in</sub>                      | 86       | 32     | 34     | 20   | 31   | 30  | 25      |
| <i>Bacteroidales</i> C. goose marker       | RCA <sub>out</sub>  URCA <sub>in</sub> | 71       | 31     | 25     | 15   | 29   | 30  | 12      |
| <i>Bacteroidales</i> C. goose marker       | URCA <sub>mid</sub>                    | 48       | 23     | 15     | 10   | 21   | 24  | 3       |
| <i>Bacteroidales</i> C. goose marker       | URCA <sub>out</sub>                    | 83       | 29     | 30     | 24   | 33   | 35  | 15      |
| <i>Bacteroidales</i> pig marker            | RCA <sub>in</sub>                      | 86       | 32     | 34     | 20   | 31   | 30  | 25      |
| <i>Bacteroidales</i> pig marker            | RCA <sub>out</sub>  URCA <sub>in</sub> | 71       | 31     | 25     | 15   | 29   | 30  | 12      |
| <i>Bacteroidales</i> pig marker            | URCA <sub>mid</sub>                    | 48       | 23     | 15     | 10   | 21   | 24  | 3       |
| <i>Bacteroidales</i> pig marker            | URCA <sub>out</sub>                    | 83       | 29     | 30     | 24   | 33   | 35  | 15      |
| <i>Bacteroidales</i> human marker          | RCA <sub>in</sub>                      | 86       | 32     | 34     | 20   | 31   | 30  | 25      |
| <i>Bacteroidales</i> human marker          | RCA <sub>out</sub>  URCA <sub>in</sub> | 71       | 31     | 25     | 15   | 29   | 30  | 12      |
| <i>Bacteroidales</i> human marker          | URCA <sub>mid</sub>                    | 48       | 23     | 15     | 10   | 21   | 24  | 3       |
| <i>Bacteroidales</i> human marker          | URCA <sub>out</sub>                    | 83       | 29     | 30     | 24   | 33   | 35  | 15      |
| Hepatitis A a/w human                      | RCA <sub>in</sub>                      | 31       | 9      | 13     | 9    | 11   | 15  | 5       |
| Hepatitis A a/w human                      | RCA <sub>out</sub>  URCA <sub>in</sub> | 27       | 9      | 9      | 9    | 11   | 13  | 3       |
| Hepatitis A a/w human                      | URCA <sub>mid</sub>                    | 23       | 6      | 8      | 9    | 9    | 11  | 3       |
| Hepatitis A a/w human                      | URCA <sub>out</sub>                    | 27       | 9      | 9      | 9    | 11   | 13  | 3       |
| Astrovirus a/w human                       | RCA <sub>in</sub>                      | 31       | 9      | 13     | 9    | 11   | 15  | 5       |
| Astrovirus a/w human                       | RCA <sub>out</sub>  URCA <sub>in</sub> | 27       | 9      | 9      | 9    | 11   | 13  | 3       |
| Astrovirus a/w human                       | URCA <sub>mid</sub>                    | 23       | 6      | 8      | 9    | 9    | 11  | 3       |
| Astrovirus a/w human                       | URCA <sub>out</sub>                    | 27       | 9      | 9      | 9    | 11   | 13  | 3       |
| Norovirus GI a/w human                     | RCA <sub>in</sub>                      | 31       | 9      | 13     | 9    | 11   | 15  | 5       |
| Norovirus GI a/w human                     | RCA <sub>out</sub>  URCA <sub>in</sub> | 27       | 9      | 9      | 9    | 11   | 13  | 3       |
| Norovirus GI a/w human                     | URCA <sub>mid</sub>                    | 23       | 6      | 8      | 9    | 9    | 11  | 3       |

| Microbial source tracking end point | Site                                   | All data | spring | summer | fall | high | low | no flow |
|-------------------------------------|----------------------------------------|----------|--------|--------|------|------|-----|---------|
| Norovirus GI a/w human              | URCA <sub>out</sub>                    | 27       | 9      | 9      | 9    | 11   | 13  | 3       |
| Norovirus GIII a/w bovine           | RCA <sub>in</sub>                      | 31       | 9      | 13     | 9    | 11   | 15  | 5       |
| Norovirus GIII a/w bovine           | RCA <sub>out</sub> \URCA <sub>in</sub> | 27       | 9      | 9      | 9    | 11   | 13  | 3       |
| Norovirus GIII a/w bovine           | URCA <sub>mid</sub>                    | 23       | 6      | 8      | 9    | 9    | 11  | 3       |
| Norovirus GIII a/w bovine           | URCA <sub>out</sub>                    | 27       | 9      | 9      | 9    | 11   | 13  | 3       |
| Norovirus GIV a/w human             | RCA <sub>in</sub>                      | 31       | 9      | 13     | 9    | 11   | 15  | 5       |
| Norovirus GIV a/w human             | RCA <sub>out</sub> \URCA <sub>in</sub> | 27       | 9      | 9      | 9    | 11   | 13  | 3       |
| Norovirus GIV a/w human             | URCA <sub>mid</sub>                    | 23       | 6      | 8      | 9    | 9    | 11  | 3       |
| Norovirus GIV a/w human             | URCA <sub>out</sub>                    | 27       | 9      | 9      | 9    | 11   | 13  | 3       |
| Sapovirus a/w human                 | RCA <sub>in</sub>                      | 31       | 9      | 13     | 9    | 11   | 13  | 5       |
| Sapovirus a/w human                 | RCA <sub>out</sub> \URCA <sub>in</sub> | 27       | 9      | 9      | 9    | 11   | 11  | 3       |
| Sapovirus a/w human                 | URCA <sub>mid</sub>                    | 23       | 6      | 8      | 9    | 9    | 13  | 3       |
| Sapovirus a/w human                 | URCA <sub>out</sub>                    | 27       | 9      | 9      | 9    | 11   | 13  | 3       |
| Human Torque teno virus             | RCA <sub>in</sub>                      | 31       | 9      | 13     | 9    | 11   | 15  | 5       |
| Human Torque teno virus             | RCA <sub>out</sub> \URCA <sub>in</sub> | 27       | 9      | 9      | 9    | 11   | 13  | 3       |
| Human Torque teno virus             | URCA <sub>mid</sub>                    | 23       | 6      | 8      | 9    | 9    | 9   | 3       |
| Human Torque teno virus             | URCA <sub>out</sub>                    | 27       | 9      | 9      | 9    | 11   | 13  | 3       |
| Torque teno sus virus a/w swine     | RCA <sub>in</sub>                      | 31       | 9      | 13     | 9    | 11   | 15  | 5       |
| Torque teno sus virus a/w swine     | RCA <sub>out</sub> \URCA <sub>in</sub> | 27       | 9      | 9      | 9    | 11   | 13  | 3       |
| Torque teno sus virus a/w swine     | URCA <sub>mid</sub>                    | 23       | 6      | 8      | 9    | 9    | 9   | 3       |
| Torque teno sus virus a/w swine     | URCA <sub>out</sub>                    | 27       | 9      | 9      | 9    | 11   | 13  | 3       |
| Adenovirus 40/41 a/w human          | RCA <sub>in</sub>                      | 31       | 9      | 13     | 9    | 11   | 15  | 5       |
| Adenovirus 40/41 a/w human          | RCA <sub>out</sub> \URCA <sub>in</sub> | 27       | 9      | 9      | 9    | 11   | 13  | 3       |
| Adenovirus 40/41 a/w human          | URCA <sub>mid</sub>                    | 23       | 6      | 8      | 9    | 9    | 9   | 3       |
| Adenovirus 40/41 a/w human          | URCA <sub>out</sub>                    | 27       | 9      | 9      | 9    | 11   | 13  | 3       |
| General Adenovirus a/w human        | RCA <sub>in</sub>                      | 31       | 9      | 13     | 9    | 11   | 15  | 5       |
| General Adenovirus a/w human        | RCA <sub>out</sub> \URCA <sub>in</sub> | 27       | 9      | 9      | 9    | 11   | 13  | 3       |
| General Adenovirus a/w human        | URCA <sub>mid</sub>                    | 23       | 6      | 8      | 9    | 9    | 9   | 3       |
| General Adenovirus a/w human        | URCA <sub>out</sub>                    | 27       | 9      | 9      | 9    | 11   | 13  | 3       |
| F-RNA coliphage human               | RCA <sub>in</sub>                      | 44       | 13     | 18     | 13   | 16   | 20  | 8       |
| F-RNA coliphage human               | RCA <sub>out</sub> \URCA <sub>in</sub> | 39       | 13     | 15     | 11   | 17   | 19  | 3       |
| F-RNA coliphage human               | URCA <sub>mid</sub>                    | 31       | 8      | 13     | 10   | 14   | 16  | 1       |
| F-RNA coliphage human               | URCA <sub>out</sub>                    | 39       | 13     | 15     | 11   | 17   | 19  | 3       |
| F-RNA coliphage animal              | RCA <sub>in</sub>                      | 44       | 13     | 18     | 13   | 16   | 20  | 8       |
| F-RNA coliphage animal              | RCA <sub>out</sub> \URCA <sub>in</sub> | 39       | 13     | 15     | 11   | 17   | 19  | 3       |
| F-RNA coliphage animal              | URCA <sub>mid</sub>                    | 31       | 8      | 13     | 10   | 14   | 16  | 1       |
| F-RNA coliphage animal              | URCA <sub>out</sub>                    | 39       | 13     | 15     | 11   | 17   | 19  | 3       |

Supplementary Table 1C. *Salmonella* serovars isolated and observed at water sampling sites for study.

| Site                                   | Year         | <i>Salmonella</i> serovar | Observations |
|----------------------------------------|--------------|---------------------------|--------------|
| RCA <sub>in</sub>                      | 2006         | Kentucky                  | 3            |
|                                        |              | Mbandaka                  | 2            |
| RCA <sub>out</sub> \URCA <sub>in</sub> | 2005         | Bovismorbificans          | 3            |
|                                        | 2006         | Kentucky                  | 3            |
|                                        |              | Mbandaka                  | 1            |
| 2009                                   | I:4,5,12:b:- | 9                         |              |
| URCA <sub>mid</sub>                    | 2009         | I:4,5,12:b:-              | 3            |
|                                        | 2010         | I:4,5,12:b:-              | 2            |
| URCA <sub>out</sub>                    | 2006         | Kentucky                  | 2            |
|                                        | 2008         | I:4,5,12:b:-              | 3            |
|                                        | 2009         | I:4,5,12:b:-              | 5            |

Supplementary Table 2A. Median (ME) and mean absolute deviation (MAD) of source *Bacteroidales* (number copies 100 mL<sup>-1</sup>) for TCD under seasonal and flow conditions with accompanying significant Kruskal–Wallis (KW) and Mann-Whitney U (W) tests amongst sites and site pairs, respectively. Significant differences between sites (identified by site number) are indicated in median column and are bolded (p<0.05). High flow  $\geq 0.018 \text{ m}^3 \text{ s}^{-1}$ ; low flow  $\geq 0.002 \text{ m}^3 \text{ s}^{-1}$  and  $< 0.018 \text{ m}^3 \text{ s}^{-1}$ ; and no flow  $< 0.002 \text{ m}^3 \text{ s}^{-1}$ .

| Microbial source tracking endpoint   | Site (#)                                    | All data |                                             | spring |                                             | summer |                           | fall  |    | high  |                                             | low    |                           | no flow |    |
|--------------------------------------|---------------------------------------------|----------|---------------------------------------------|--------|---------------------------------------------|--------|---------------------------|-------|----|-------|---------------------------------------------|--------|---------------------------|---------|----|
|                                      |                                             | MAD      | ME                                          | MAD    | ME                                          | MAD    | ME                        | MAD   | ME | MAD   | ME                                          | MAD    | ME                        | MAD     | ME |
| <i>Bacteroidales</i> ruminant marker | RCA <sub>in</sub> (18)                      | 1265     | 0                                           | 981    | 0                                           | 1081   | 0                         | 2087  | 0  | 389   | <b>0</b> <sub>(15W)</sub>                   | 1644   | 0                         | 2038    | 0  |
| <i>Bacteroidales</i> ruminant marker | RCA <sub>out</sub> \URCA <sub>in</sub> (22) | 51627    | <b>0</b> <sub>(15W)</sub>                   | 124147 | 0                                           | 849    | 0                         | 1157  | 0  | 400   | 0                                           | 751    | <b>0</b> <sub>(15W)</sub> | 277286  | 0  |
| <i>Bacteroidales</i> ruminant marker | URCA <sub>out</sub> (15)                    | 38345    | <b>0</b> <sub>(22W)</sub>                   | 1826   | 0                                           | 97223  | 0                         | 7834  | 0  | 1364  | <b>0</b> <sub>(18W)</sub>                   | 81312  | <b>0</b> <sub>(22W)</sub> | 16828   | 0  |
| <i>Bacteroidales</i> muskrat marker  | RCA <sub>in</sub> (18)                      | 136      | <b>0</b> <sup>KW</sup>                      | 0      | <b>0</b> <sup>KW</sup> <sub>(22W)</sub>     | 304    | 0                         | 117   | 0  | 0     | <b>0</b> <sup>KW</sup>                      | 136    | 0                         | 414     | 0  |
| <i>Bacteroidales</i> muskrat marker  | RCA <sub>out</sub> \URCA <sub>in</sub> (22) | 513      | <b>0</b> <sup>KW</sup> <sub>(15W)</sub>     | 710    | <b>0</b> <sup>KW</sup> <sub>(18W;15W)</sub> | 356    | 0                         | 358   | 0  | 258   | <b>0</b> <sup>KW</sup>                      | 916    | 0                         | 0       | 0  |
| <i>Bacteroidales</i> muskrat marker  | URCA <sub>out</sub> (15)                    | 310      | <b>0</b> <sup>KW</sup> <sub>(22W)</sub>     | 0      | <b>0</b> <sup>KW</sup> <sub>(22W)</sub>     | 878    | 0                         | 0     | 0  | 0     | <b>0</b> <sup>KW</sup>                      | 727    | 0                         | 0       | 0  |
| <i>Bacteroidales</i> C. goose marker | RCA <sub>in</sub> (18)                      | 211      | <b>0</b> <sup>KW</sup> <sub>(22W)</sub>     | 0      | <b>0</b> <sup>KW</sup> <sub>(22W)</sub>     | 597    | 0                         | 0     | 0  | 0     | <b>0</b> <sup>KW</sup> <sub>(22W)</sub>     | 494    | 0                         | 0       | 0  |
| <i>Bacteroidales</i> C. goose marker | RCA <sub>out</sub> \URCA <sub>in</sub> (22) | 4943     | <b>0</b> <sup>KW</sup> <sub>(18W;15W)</sub> | 7817   | <b>0</b> <sup>KW</sup> <sub>(18W;15W)</sub> | 3594   | 0                         | 139   | 0  | 3168  | <b>0</b> <sup>KW</sup> <sub>(18W)</sub>     | 8436   | <b>0</b> <sub>(15W)</sub> | 0       | 0  |
| <i>Bacteroidales</i> C. goose marker | URCA <sub>out</sub> (15)                    | 575      | <b>0</b> <sup>KW</sup> <sub>(22W)</sub>     | 1302   | <b>0</b> <sup>KW</sup> <sub>(22W)</sub>     | 0      | 0                         | 0     | 0  | 1395  | <b>0</b> <sup>KW</sup>                      | 0      | <b>0</b> <sub>(22W)</sub> | 0       | 0  |
| <i>Bacteroidales</i> pig marker      | RCA <sub>in</sub> (18)                      | 1525     | 0                                           | 166    | 0                                           | 2168   | <b>0</b> <sup>KW</sup>    | 2993  | 0  | 3078  | <b>0</b> <sub>(15W)</sub>                   | 443    | 0                         | 0       | 0  |
| <i>Bacteroidales</i> pig marker      | RCA <sub>out</sub> \URCA <sub>in</sub> (22) | 589      | 0                                           | 1333   | 0                                           | 0      | <b>0</b> <sup>KW</sup>    | 0     | 0  | 1428  | 0                                           | 0      | 0                         | 0       | 0  |
| <i>Bacteroidales</i> pig marker      | URCA <sub>out</sub> (15)                    | 652      | 0                                           | 0      | 0                                           | 0      | <b>0</b> <sup>KW</sup>    | 2759  | 0  | 0     | <b>0</b> <sub>(18W)</sub>                   | 1527   | 0                         | 0       | 0  |
| <i>Bacteroidales</i> human marker    | RCA <sub>in</sub> (18)                      | 3271     | <b>0</b> <sup>KW</sup> <sub>(22W;15W)</sub> | 1899   | 0                                           | 7081   | <b>0</b> <sub>(22W)</sub> | 0     | 0  | 0     | <b>0</b> <sup>KW</sup> <sub>(22W;15W)</sub> | 1962   | 0                         | 13006   | 0  |
| <i>Bacteroidales</i> human marker    | RCA <sub>out</sub> \URCA <sub>in</sub> (22) | 159125   | <b>0</b> <sup>KW</sup> <sub>(18W)</sub>     | 309772 | 0                                           | 75443  | <b>0</b> <sub>(18W)</sub> | 22232 | 0  | 30486 | <b>0</b> <sup>KW</sup> <sub>(18W)</sub>     | 353246 | 0                         | 2813    | 0  |
| <i>Bacteroidales</i> human marker    | URCA <sub>out</sub> (15)                    | 18854    | <b>0</b> <sup>KW</sup> <sub>(18W)</sub>     | 17127  | 0                                           | 23256  | 0                         | 15324 | 0  | 16506 | <b>0</b> <sup>KW</sup> <sub>(18W)</sub>     | 10597  | 0                         | 38375   | 0  |



Supplementary Table 2B. Mean (M) source *Bacteroidales* (copies 100 mL<sup>-1</sup>), number of samples (N), and standard deviation (SD) for TCD under different season and flow conditions. See Suppl. 2A for flow regime definition.

| Microbial source tracking endpoint   | Site                                   | All data |       |        | Spring |        |        | summer |       |        | fall |       |       | high |       |       | low |        |        | no flow |        |        |
|--------------------------------------|----------------------------------------|----------|-------|--------|--------|--------|--------|--------|-------|--------|------|-------|-------|------|-------|-------|-----|--------|--------|---------|--------|--------|
|                                      |                                        | N        | M     | SD     | N      | M      | SD     | N      | M     | SD     | N    | M     | SD    | N    | M     | SD    | N   | M      | SD     | N       | M      | SD     |
| <i>Bacteroidales</i> ruminant marker | RCA <sub>in</sub>                      | 64       | 764   | 2378   | 26     | 607    | 1338   | 23     | 655   | 2001   | 15   | 1204  | 3959  | 26   | 211   | 761   | 27  | 1057   | 3036   | 11      | 1353   | 2965   |
| <i>Bacteroidales</i> ruminant marker | RCA <sub>out</sub> \URCA <sub>in</sub> | 64       | 26672 | 209789 | 26     | 64813  | 329176 | 23     | 514   | 1205   | 15   | 668   | 2155  | 26   | 226   | 644   | 27  | 406    | 1657   | 11      | 153651 | 505813 |
| <i>Bacteroidales</i> ruminant marker | URCA <sub>out</sub>                    | 64       | 21182 | 140951 | 26     | 1187   | 3342   | 23     | 54548 | 234284 | 15   | 4678  | 16264 | 26   | 981   | 2483  | 27  | 45293  | 216110 | 11      | 9747   | 30718  |
| <i>Bacteroidales</i> muskrat marker  | RCA <sub>in</sub>                      | 67       | 71    | 372    | 29     | 0      | 0      | 23     | 166   | 601    | 15   | 63    | 244   | 27   | 0     | 0     | 28  | 73     | 271    | 12      | 226    | 783    |
| <i>Bacteroidales</i> muskrat marker  | RCA <sub>out</sub> \URCA <sub>in</sub> | 67       | 292   | 1126   | 29     | 412    | 1522   | 23     | 195   | 776    | 15   | 207   | 584   | 27   | 145   | 461   | 28  | 558    | 1661   | 12      | 0      | 0      |
| <i>Bacteroidales</i> muskrat marker  | URCA <sub>out</sub>                    | 67       | 157   | 1289   | 29     | 0      | 0      | 23     | 459   | 2200   | 15   | 0     | 0     | 27   | 0     | 0     | 28  | 377    | 1994   | 12      | 0      | 0      |
| <i>Bacteroidales</i> C. goose marker | RCA <sub>in</sub>                      | 67       | 107   | 877    | 29     | 0      | 0      | 23     | 312   | 1497   | 15   | 0     | 0     | 27   | 0     | 0     | 28  | 256    | 1357   | 12      | 0      | 0      |
| <i>Bacteroidales</i> C. goose marker | RCA <sub>out</sub> \URCA <sub>in</sub> | 67       | 2825  | 10589  | 29     | 4928   | 14005  | 23     | 1968  | 8656   | 15   | 75    | 289   | 27   | 1908  | 5797  | 28  | 4921   | 15257  | 12      | 0      | 0      |
| <i>Bacteroidales</i> C. goose marker | URCA <sub>out</sub>                    | 67       | 292   | 2389   | 29     | 674    | 3631   | 23     | 0     | 0      | 15   | 0     | 0     | 27   | 724   | 3763  | 28  | 0      | 0      | 12      | 0      | 0      |
| <i>Bacteroidales</i> pig marker      | RCA <sub>in</sub>                      | 67       | 824   | 3738   | 29     | 86     | 464    | 23     | 1247  | 3975   | 15   | 1603  | 6209  | 27   | 1807  | 5678  | 28  | 230    | 1217   | 12      | 0      | 0      |
| <i>Bacteroidales</i> pig marker      | RCA <sub>out</sub> \URCA <sub>in</sub> | 67       | 299   | 2446   | 29     | 690    | 3718   | 23     | 0     | 0      | 15   | 0     | 0     | 27   | 742   | 3854  | 28  | 0      | 0      | 12      | 0      | 0      |
| <i>Bacteroidales</i> pig marker      | URCA <sub>out</sub>                    | 67       | 331   | 2709   | 29     | 0      | 0      | 23     | 0     | 0      | 15   | 1478  | 5724  | 27   | 0     | 0     | 28  | 792    | 4190   | 12      | 0      | 0      |
| <i>Bacteroidales</i> human marker    | RCA <sub>in</sub>                      | 67       | 1712  | 10785  | 29     | 1020   | 4614   | 23     | 3701  | 17750  | 15   | 0     | 0     | 27   | 0     | 0     | 28  | 1057   | 4695   | 12      | 7094   | 24574  |
| <i>Bacteroidales</i> human marker    | RCA <sub>out</sub> \URCA <sub>in</sub> | 67       | 91228 | 573338 | 29     | 165815 | 864303 | 23     | 47617 | 146426 | 15   | 13895 | 29582 | 27   | 19598 | 40050 | 28  | 198673 | 883917 | 12      | 1688   | 4612   |
| <i>Bacteroidales</i> human marker    | URCA <sub>out</sub>                    | 67       | 10797 | 32690  | 29     | 9552   | 30671  | 23     | 13518 | 39997  | 15   | 9033  | 24973 | 27   | 9389  | 30191 | 28  | 5818   | 21172  | 12      | 25583  | 53390  |

Supplementary Table 3A. Median (ME) and mean absolute deviation (MAD) of source *Bacteroidales* (copies 100 mL<sup>-1</sup>) for AAD under seasonal and flow conditions with accompanying significant Kruskal–Wallis (KW) and Mann-Whitney U (W) tests amongst sites and site pairs, respectively. Significant differences between sites (identified by site number) are indicated in median column and are bolded ( $p < 0.05$ ). See Suppl.2A for flow regime definition.

| Microbial source tracking end point  | Site (Site #)                               | All data |                                            | spring |                                            | summer |                                               | fall  |                                                  | high  |                                            | low    |                                            | no flow |    |
|--------------------------------------|---------------------------------------------|----------|--------------------------------------------|--------|--------------------------------------------|--------|-----------------------------------------------|-------|--------------------------------------------------|-------|--------------------------------------------|--------|--------------------------------------------|---------|----|
|                                      |                                             | MAD      | ME                                         | MAD    | ME                                         | MAD    | ME                                            | MAD   | ME                                               | MAD   | ME                                         | MAD    | ME                                         | MAD     | ME |
| <i>Bacteroidales</i> ruminant marker | RCA <sub>in</sub> (18)                      | 1165     | <b>0<sup>KW</sup></b> <sub>(15W)</sub>     | 901    | 0                                          | 1138   | <b>0<sup>KW</sup></b> <sub>(23W)</sub>        | 1626  | <b>0<sup>KW</sup></b> <sub>(15W)</sub>           | 341   | <b>0<sup>KW</sup></b> <sub>(15W)</sub>     | 1561   | <b>0<sup>KW</sup></b>                      | 1562    | 0  |
| <i>Bacteroidales</i> ruminant marker | RCA <sub>out</sub> \URCA <sub>in</sub> (22) | 48636    | <b>0<sup>KW</sup></b> <sub>(15W)</sub>     | 115608 | 0                                          | 794    | <b>0<sup>KW</sup></b> <sub>(23W)</sub>        | 1157  | <b>0<sup>KW</sup></b> <sub>(15W)</sub>           | 417   | <b>0<sup>KW</sup></b> <sub>(15W)</sub>     | 703    | <b>0<sup>KW</sup></b> <sub>(23W;15W)</sub> | 277286  | 0  |
| <i>Bacteroidales</i> ruminant marker | URCA <sub>mid</sub> (23)                    | 6829     | <b>0<sup>KW</sup></b>                      | 1327   | 0                                          | 14940  | <b>4898<sup>KW</sup></b> <sub>(18W;22W)</sub> | 0     | <b>0<sup>KW</sup></b> <sub>(15W)</sub>           | 3627  | <b>0<sup>KW</sup></b>                      | 9646   | <b>0<sup>KW</sup></b> <sub>(22W)</sub>     | 4961    | 0  |
| <i>Bacteroidales</i> ruminant marker | URCA <sub>out</sub> (15)                    | 30346    | <b>0<sup>KW</sup></b> <sub>(18W;22W)</sub> | 1688   | 0                                          | 75952  | <b>0<sup>KW</sup></b>                         | 7193  | <b>875<sup>KW</sup></b> <sub>(18W;22W;23W)</sub> | 1496  | <b>0<sup>KW</sup></b> <sub>(18W;22W)</sub> | 63769  | <b>0<sup>KW</sup></b> <sub>(22W)</sub>     | 16894   | 0  |
| <i>Bacteroidales</i> muskrat marker  | RCA <sub>in</sub> (18)                      | 210      | 0                                          | 0      | <b>0<sup>KW</sup></b> <sub>(22W)</sub>     | 456    | 0                                             | 90    | 0                                                | 0     | 0                                          | 128    | 0                                          | 544     | 0  |
| <i>Bacteroidales</i> muskrat marker  | RCA <sub>out</sub> \URCA <sub>in</sub> (22) | 488      | <b>0<sub>(15W)</sub></b>                   | 671    | <b>0<sup>KW</sup></b> <sub>(18W;15W)</sub> | 330    | 0                                             | 358   | 0                                                | 242   | 0                                          | 867    | 0                                          | 0       | 0  |
| <i>Bacteroidales</i> muskrat marker  | URCA <sub>mid</sub> (23)                    | 531      | 0                                          | 133    | <b>0<sup>KW</sup></b>                      | 0      | 0                                             | 1920  | <b>0<sub>(15W)</sub></b>                         | 317   | 0                                          | 772    | 0                                          | 0       | 0  |
| <i>Bacteroidales</i> muskrat marker  | URCA <sub>out</sub> (15)                    | 251      | <b>0<sub>(22W)</sub></b>                   | 0      | <b>0<sup>KW</sup></b> <sub>(22W)</sub>     | 680    | 0                                             | 0     | <b>0<sub>(23W)</sub></b>                         | 0     | 0                                          | 586    | 0                                          | 0       | 0  |
| <i>Bacteroidales</i> C. goose marker | RCA <sub>in</sub> (18)                      | 1113     | <b>0<sup>KW</sup></b>                      | 882    | <b>0<sup>KW</sup></b> <sub>(22W)</sub>     | 1910   | 0                                             | 0     | 0                                                | 0     | <b>0<sup>KW</sup></b> <sub>(22W)</sub>     | 463    | <b>0<sup>KW</sup></b>                      | 3028    | 0  |
| <i>Bacteroidales</i> C. goose marker | RCA <sub>out</sub> \URCA <sub>in</sub> (22) | 4700     | <b>0<sup>KW</sup></b> <sub>(23W;15W)</sub> | 7436   | <b>0<sup>KW</sup></b> <sub>(18W)</sub>     | 3331   | 0                                             | 139   | 0                                                | 2985  | <b>0<sup>KW</sup></b> <sub>(18W;23W)</sub> | 7961   | <b>0<sup>KW</sup></b> <sub>(15W)</sub>     | 0       | 0  |
| <i>Bacteroidales</i> C. goose marker | URCA <sub>mid</sub> (23)                    | 0        | <b>0<sup>KW</sup></b> <sub>(22W)</sub>     | 0      | <b>0<sup>KW</sup></b>                      | 0      | 0                                             | 0     | 0                                                | 0     | <b>0<sup>KW</sup></b> <sub>(22W)</sub>     | 0      | <b>0<sup>KW</sup></b>                      | 0       | 0  |
| <i>Bacteroidales</i> C. goose marker | URCA <sub>out</sub> (15)                    | 465      | <b>0<sup>KW</sup></b> <sub>(22W)</sub>     | 1302   | <b>0<sup>KW</sup></b>                      | 0      | 0                                             | 0     | 0                                                | 1149  | <b>0<sup>KW</sup></b>                      | 0      | <b>0<sup>KW</sup></b> <sub>(22W)</sub>     | 0       | 0  |
| <i>Bacteroidales</i> pig marker      | RCA <sub>in</sub> (18)                      | 1384     | 0                                          | 151    | 0                                          | 1942   | <b>0<sup>KW</sup></b>                         | 2284  | 0                                                | 2741  | 0                                          | 415    | 0                                          | 672     | 0  |
| <i>Bacteroidales</i> pig marker      | RCA <sub>out</sub> \URCA <sub>in</sub> (22) | 556      | 0                                          | 1250   | 0                                          | 0      | <b>0<sup>KW</sup></b>                         | 0     | 0                                                | 1333  | 0                                          | 0      | 0                                          | 0       | 0  |
| <i>Bacteroidales</i> pig marker      | URCA <sub>mid</sub> (23)                    | 83       | 0                                          | 168    | 0                                          | 0      | <b>0<sup>KW</sup></b>                         | 0     | 0                                                | 184   | 0                                          | 0      | 0                                          | 0       | 0  |
| <i>Bacteroidales</i> pig marker      | URCA <sub>out</sub> (15)                    | 592      | 0                                          | 0      | 0                                          | 0      | <b>0<sup>KW</sup></b>                         | 1923  | 0                                                | 177   | 0                                          | 1231   | 0                                          | 0       | 0  |
| <i>Bacteroidales</i> human marker    | RCA <sub>in</sub> (18)                      | 2575     | <b>0<sup>KW</sup></b> <sub>(22W;15W)</sub> | 1733   | 0                                          | 4860   | <b>0<sup>KW</sup></b> <sub>(22W)</sub>        | 0     | <b>0<sub>(22W)</sub></b>                         | 0     | <b>0<sup>KW</sup></b> <sub>(22W;15W)</sub> | 1841   | 0                                          | 6538    | 0  |
| <i>Bacteroidales</i> human marker    | RCA <sub>out</sub> \URCA <sub>in</sub> (22) | 150884   | <b>0<sup>KW</sup></b> <sub>(18W;23W)</sub> | 290477 | 0                                          | 70627  | <b>0<sup>KW</sup></b> <sub>(18W;23W)</sub>    | 22232 | <b>0<sup>(18W)</sup></b>                         | 28943 | <b>0<sup>KW</sup></b> <sub>(18W;23W)</sub> | 332345 | <b>0<sub>(23W)</sub></b>                   | 2813    | 0  |
| <i>Bacteroidales</i> human marker    | URCA <sub>mid</sub> (23)                    | 0        | <b>0<sup>KW</sup></b> <sub>(22W;15W)</sub> | 0      | 0                                          | 0      | <b>0<sup>KW</sup></b> <sub>(22W)</sub>        | 0     | 0                                                | 0     | <b>0<sup>KW</sup></b> <sub>(22W)</sub>     | 0      | <b>0<sub>(22W)</sub></b>                   | 0       | 0  |
| <i>Bacteroidales</i> human marker    | URCA <sub>out</sub> (15)                    | 16217    | <b>0<sup>KW</sup></b> <sub>(18W;23W)</sub> | 17127  | 0                                          | 18461  | <b>0<sup>KW</sup></b>                         | 12406 | 0                                                | 13815 | <b>0<sup>KW</sup></b> <sub>(18W)</sub>     | 10304  | 0                                          | 32747   | 0  |

Supplementary Table 3B. Mean (M) source *Bacteroidales* (copies 100 mL<sup>-1</sup>) and number of samples (N) and standard deviation (SD) for AAD under season and flow conditions. See Suppl.2A for flow regime definition.

| Microbial source tracking endpoint   | Site                                   | All data |       |        | spring |        |        | summer |       |        | fall |       |       | high |       |       | low |        |        | no flow |        |        |
|--------------------------------------|----------------------------------------|----------|-------|--------|--------|--------|--------|--------|-------|--------|------|-------|-------|------|-------|-------|-----|--------|--------|---------|--------|--------|
|                                      |                                        | N        | M     | SD     | N      | M      | SD     | N      | M     | SD     | N    | M     | SD    | N    | M     | SD    | N   | M      | SD     | N       | M      | SD     |
| <i>Bacteroidales</i> ruminant marker | RCA <sub>in</sub>                      | 83       | 681   | 2244   | 29     | 544    | 1278   | 34     | 667   | 2066   | 20   | 903   | 3440  | 30   | 183   | 710   | 29  | 984    | 2938   | 24      | 937    | 2510   |
| <i>Bacteroidales</i> ruminant marker | RCA <sub>out</sub> \URCA <sub>in</sub> | 68       | 25116 | 203527 | 28     | 60217  | 317199 | 25     | 473   | 1163   | 15   | 668   | 2155  | 28   | 243   | 636   | 29  | 378    | 1600   | 11      | 153651 | 505813 |
| <i>Bacteroidales</i> ruminant marker | URCA <sub>mid</sub>                    | 48       | 4495  | 13153  | 23     | 727    | 2465   | 15     | 13271 | 21235  | 10   | 0     | 0     | 21   | 2240  | 7064  | 24  | 6566   | 17243  | 3       | 3721   | 6445   |
| <i>Bacteroidales</i> ruminant marker | URCA <sub>out</sub>                    | 83       | 17709 | 123795 | 29     | 1064   | 3179   | 30     | 43939 | 205087 | 24   | 5033  | 13325 | 33   | 1192  | 2462  | 35  | 36170  | 189778 | 15      | 10969  | 27156  |
| <i>Bacteroidales</i> muskrat marker  | RCA <sub>in</sub>                      | 86       | 110   | 598    | 32     | 0      | 0      | 34     | 250   | 927    | 20   | 47    | 211   | 31   | 0     | 0     | 30  | 69     | 262    | 25      | 296    | 1062   |
| <i>Bacteroidales</i> muskrat marker  | RCA <sub>out</sub> \URCA <sub>in</sub> | 71       | 275   | 1095   | 31     | 385    | 1474   | 25     | 179   | 745    | 15   | 207   | 584   | 29   | 135   | 445   | 30  | 521    | 1609   | 12      | 0      | 0      |
| <i>Bacteroidales</i> muskrat marker  | URCA <sub>mid</sub>                    | 48       | 283   | 1331   | 23     | 70     | 334    | 15     | 0     | 0      | 10   | 1200  | 2791  | 21   | 167   | 764   | 24  | 421    | 1752   | 3       | 0      | 0      |
| <i>Bacteroidales</i> muskrat marker  | URCA <sub>out</sub>                    | 83       | 127   | 1158   | 29     | 0      | 0      | 30     | 352   | 1927   | 24   | 0     | 0     | 33   | 0     | 0     | 35  | 301    | 1784   | 15      | 0      | 0      |
| <i>Bacteroidales</i> C. goose marker | RCA <sub>in</sub>                      | 86       | 584   | 2921   | 32     | 455    | 2576   | 34     | 1047  | 3911   | 20   | 0     | 0     | 31   | 0     | 0     | 30  | 239    | 1311   | 25      | 1720   | 5119   |
| <i>Bacteroidales</i> C. goose marker | RCA <sub>out</sub> \URCA <sub>in</sub> | 71       | 2666  | 10303  | 31     | 4610   | 13586  | 25     | 1811  | 8306   | 15   | 75    | 289   | 29   | 1776  | 5608  | 30  | 4593   | 14774  | 12      | 0      | 0      |
| <i>Bacteroidales</i> C. goose marker | URCA <sub>mid</sub>                    | 48       | 0     | 0      | 23     | 0      | 0      | 15     | 0     | 0      | 10   | 0     | 0     | 21   | 0     | 0     | 24  | 0      | 0      | 3       | 0      | 0      |
| <i>Bacteroidales</i> C. goose marker | URCA <sub>out</sub>                    | 83       | 236   | 2146   | 29     | 674    | 3631   | 30     | 0     | 0      | 24   | 0     | 0     | 33   | 593   | 3404  | 35  | 0      | 0      | 15      | 0      | 0      |
| <i>Bacteroidales</i> pig marker      | RCA <sub>in</sub>                      | 86       | 744   | 3424   | 32     | 78     | 442    | 34     | 1101  | 3562   | 20   | 1202  | 5377  | 31   | 1574  | 5322  | 30  | 215    | 1175   | 25      | 350    | 1749   |
| <i>Bacteroidales</i> pig marker      | RCA <sub>out</sub> \URCA <sub>in</sub> | 71       | 282   | 2376   | 31     | 646    | 3596   | 25     | 0     | 0      | 15   | 0     | 0     | 29   | 690   | 3718  | 30  | 0      | 0      | 12      | 0      | 0      |
| <i>Bacteroidales</i> pig marker      | URCA <sub>mid</sub>                    | 48       | 42    | 292    | 23     | 88     | 422    | 15     | 0     | 0      | 10   | 0     | 0     | 21   | 96    | 442   | 24  | 0      | 0      | 3       | 0      | 0      |
| <i>Bacteroidales</i> pig marker      | URCA <sub>out</sub>                    | 83       | 303   | 2452   | 29     | 0      | 0      | 30     | 0     | 0      | 24   | 1049  | 4540  | 33   | 91    | 523   | 35  | 633    | 3748   | 15      | 0      | 0      |
| <i>Bacteroidales</i> human marker    | RCA <sub>in</sub>                      | 86       | 1334  | 9530   | 32     | 924    | 4396   | 34     | 2504  | 14599  | 20   | 0     | 0     | 31   | 0     | 0     | 30  | 986    | 4538   | 25      | 3405   | 17026  |
| <i>Bacteroidales</i> human marker    | RCA <sub>out</sub> \URCA <sub>in</sub> | 71       | 86088 | 557119 | 31     | 155117 | 836022 | 25     | 43808 | 140811 | 15   | 13895 | 29582 | 29   | 18246 | 38922 | 30  | 185428 | 854381 | 12      | 1688   | 4612   |
| <i>Bacteroidales</i> human marker    | URCA <sub>mid</sub>                    | 48       | 0     | 0      | 23     | 0      | 0      | 15     | 0     | 0      | 10   | 0     | 0     | 21   | 0     | 0     | 24  | 0      | 0      | 3       | 0      | 0      |
| <i>Bacteroidales</i> human marker    | URCA <sub>out</sub>                    | 83       | 9168  | 29790  | 29     | 9552   | 30671  | 30     | 10364 | 35319  | 24   | 7208  | 20970 | 33   | 7682  | 27461 | 35  | 5726   | 19785  | 15      | 20467  | 48496  |

Supplementary Table 4: Presence and absence of microbial source tracking endpoints associated with final CART classification model criteria based on site, season and flow regime using TCD. High flow  $\geq 0.018 \text{ m}^3 \text{ s}^{-1}$ ; low flow  $\geq 0.002 \text{ m}^3 \text{ s}^{-1}$  and  $< 0.018 \text{ m}^3 \text{ s}^{-1}$ ; and no flow  $< 0.002 \text{ m}^3 \text{ s}^{-1}$ . A/w, associated with.

| Microbial source tracking endpoints  | CART Classification Criteria                                                                      | Presence | Absence | Percent presence | Percent absence |
|--------------------------------------|---------------------------------------------------------------------------------------------------|----------|---------|------------------|-----------------|
| <i>Cryptosporidium</i> a/w livestock | All data                                                                                          | 8        | 66      | 11               | 89              |
| <i>Cryptosporidium</i> a/w livestock | (Spring) and (summer)                                                                             | 0        | 50      | 0                | 100             |
| <i>Cryptosporidium</i> a/w livestock | (Fall) AND (low flow) AND (no flow)                                                               | 0        | 2       | 0                | 100             |
| <i>Cryptosporidium</i> a/w livestock | (Fall) AND (high flow)                                                                            | 8        | 14      | 36               | 64              |
| <i>Cryptosporidium</i> a/w wildlife  | All data                                                                                          | 29       | 45      | 39               | 61              |
| <i>Cryptosporidium</i> a/w wildlife  | (Spring) and (summer)                                                                             | 14       | 36      | 28               | 72              |
| <i>Cryptosporidium</i> a/w wildlife  | (Fall) AND (low flow) AND (No flow)                                                               | 0        | 2       | 0                | 100             |
| <i>Cryptosporidium</i> a/w wildlife  | (Fall) AND (high flow)                                                                            | 15       | 7       | 68               | 32              |
| <i>Cryptosporidium</i> a/w avian     | All data                                                                                          | 3        | 71      | 4                | 96              |
| <i>Cryptosporidium</i> a/w avian     | (Low flow)                                                                                        | 0        | 22      | 0                | 100             |
| <i>Cryptosporidium</i> a/w avian     | (High flow) AND (no flow)                                                                         | 3        | 49      | 6                | 94              |
| <i>Cryptosporidium</i> a/w human     | -                                                                                                 | -        | -       | -                | -               |
| <i>Cryptosporidium</i> a/w muskrat   | All data                                                                                          | 23       | 51      | 31               | 69              |
| <i>Cryptosporidium</i> a/w muskrat   | (Spring)                                                                                          | 1        | 11      | 8                | 92              |
| <i>Cryptosporidium</i> a/w muskrat   | (Summer) AND (fall)                                                                               | 22       | 40      | 35               | 65              |
| <i>Cryptosporidium</i> a/w unknown   | All data                                                                                          | 8        | 66      | 11               | 89              |
| <i>Cryptosporidium</i> a/w unknown   | (Spring) AND (summer)                                                                             | 2        | 48      | 4                | 96              |
| <i>Cryptosporidium</i> a/w unknown   | (Fall)                                                                                            | 6        | 18      | 25               | 75              |
| <i>Bacteroidales</i> ruminant marker | All data                                                                                          | 40       | 152     | 21               | 79              |
| <i>Bacteroidales</i> ruminant marker | (URCA <sub>out</sub> )                                                                            | 20       | 44      | 31               | 69              |
| <i>Bacteroidales</i> ruminant marker | (RCA <sub>in</sub> ) AND (RCA <sub>out</sub> \URCA <sub>in</sub> ) AND (high flow) AND (low flow) | 13       | 93      | 12               | 88              |
| <i>Bacteroidales</i> ruminant marker | (RCA <sub>in</sub> ) AND (RCA <sub>out</sub> \URCA <sub>in</sub> ) AND (no flow)                  | 7        | 15      | 32               | 68              |
| <i>Bacteroidales</i> muskrat marker  | All data                                                                                          | 12       | 189     | 6                | 94              |
| <i>Bacteroidales</i> muskrat marker  | (RCA <sub>in</sub> ) AND (URCA <sub>out</sub> )                                                   | 4        | 130     | 3                | 97              |
| <i>Bacteroidales</i> muskrat marker  | (RCA <sub>out</sub> \URCA <sub>in</sub> ) AND (no flow)                                           | 0        | 12      | 0                | 100             |
| <i>Bacteroidales</i> muskrat marker  | (RCA <sub>out</sub> \URCA <sub>in</sub> ) AND (high flow) AND (low flow)                          | 8        | 47      | 15               | 85              |
| <i>Bacteroidales</i> C. goose marker | All data                                                                                          | 11       | 190     | 5                | 95              |
| <i>Bacteroidales</i> C. goose marker | (RCA <sub>in</sub> ) AND (URCA <sub>out</sub> )                                                   | 2        | 132     | 1                | 99              |
| <i>Bacteroidales</i> C. goose marker | (RCA <sub>out</sub> \URCA <sub>in</sub> )                                                         | 9        | 58      | 13               | 87              |
| <i>Bacteroidales</i> pig marker      | All data                                                                                          | 7        | 194     | 3                | 97              |
| <i>Bacteroidales</i> pig marker      | (RCA <sub>in</sub> )                                                                              | 5        | 62      | 7                | 93              |
| <i>Bacteroidales</i> pig marker      | (RCA <sub>out</sub> \URCA <sub>in</sub> ) AND (URCA <sub>out</sub> )                              | 2        | 132     | 1                | 99              |
| <i>Bacteroidales</i> human marker    | All data                                                                                          | 26       | 175     | 13               | 87              |
| <i>Bacteroidales</i> human marker    | (RCA <sub>in</sub> )                                                                              | 3        | 64      | 4                | 96              |
| <i>Bacteroidales</i> human marker    | (RCA <sub>out</sub> \URCA <sub>in</sub> ) AND (URCA <sub>out</sub> ) AND (spring)                 | 6        | 52      | 10               | 90              |
| <i>Bacteroidales</i> human marker    | (RCA <sub>out</sub> \URCA <sub>in</sub> ) AND (URCA <sub>out</sub> ) AND (summer) AND (fall)      | 17       | 59      | 22               | 78              |

| Microbial source tracking endpoints | CART Classification Criteria                                                                   | Presence | Absence | Percent presence | Percent absence |
|-------------------------------------|------------------------------------------------------------------------------------------------|----------|---------|------------------|-----------------|
| Hepatitis A a/w human               | -                                                                                              | -        | -       | -                | -               |
| Astrovirus a/w human                | -                                                                                              | -        | -       | -                | -               |
| Astrovirus a/w human                | All data                                                                                       | 10       | 71      | 12               | 88              |
| Astrovirus a/w human                | (High flow)                                                                                    | 1        | 32      | 3                | 97              |
| Astrovirus a/w human                | (Low flow) AND (no flow)                                                                       | 9        | 39      | 19               | 81              |
| Norovirus GI a/w human              | All data                                                                                       | 11       | 70      | 14               | 86              |
| Norovirus GI a/w human              | (Fall)                                                                                         | 0        | 27      | 0                | 100             |
| Norovirus GI a/w human              | (Spring) AND (summer) AND (no flow)                                                            | 0        | 9       | 0                | 100             |
| Norovirus GI a/w human              | (Spring) AND (summer) AND (high flow) AND (low flow)                                           | 11       | 34      | 24               | 76              |
| Norovirus GIII a/w bovine           | All data                                                                                       | 9        | 72      | 11               | 89              |
| Norovirus GIII a/w bovine           | (Fall)                                                                                         | 0        | 27      | 0                | 100             |
| Norovirus GIII a/w bovine           | (Spring) AND (summer) AND (no flow)                                                            | 0        | 9       | 0                | 100             |
| Norovirus GIII a/w bovine           | (Spring) AND (summer) AND (high flow) AND (low flow)                                           | 9        | 36      | 20               | 80              |
| Norovirus GIV a/w human             | All data                                                                                       | 6        | 75      | 7                | 93              |
| Norovirus GIV a/w human             | (High flow) AND (no flow)                                                                      | 0        | 42      | 0                | 100             |
| Norovirus GIV a/w human             | (Low flow)                                                                                     | 6        | 33      | 15               | 85              |
| Sapovirus a/w human                 | -                                                                                              | -        | -       | -                | -               |
| Human Torque teno virus             | All data                                                                                       | 7        | 74      | 9                | 91              |
| Human Torque teno virus             | (RCA <sub>in</sub> ) AND (RCA <sub>out</sub> \URCA <sub>in</sub> )                             | 3        | 51      | 6                | 94              |
| Human Torque teno virus             | (URCA <sub>out</sub> ) AND (spring) AND (summer)                                               | 4        | 14      | 22               | 78              |
| Human Torque teno virus             | (URCA <sub>out</sub> ) AND (fall)                                                              | 0        | 9       | 0                | 100             |
| Torque teno sus virus a/w swine     | All data                                                                                       | 6        | 75      | 7                | 93              |
| Torque teno sus virus a/w swine     | (RCA <sub>in</sub> )                                                                           | 0        | 27      | 0                | 100             |
| Torque teno sus virus a/w swine     | (RCA <sub>out</sub> \URCA <sub>in</sub> ) AND (URCA <sub>out</sub> ) AND (fall)                | 0        | 18      | 0                | 100             |
| Torque teno sus virus a/w swine     | (RCA <sub>out</sub> \URCA <sub>in</sub> ) AND (URCA <sub>out</sub> ) AND (spring) AND (summer) | 6        | 30      | 17               | 83              |
| Adenovirus 40/41 a/w human          | All data                                                                                       | 3        | 78      | 4                | 96              |
| Adenovirus 40/41 a/w human          | (High flow) AND (low flow)                                                                     | 0        | 72      | 0                | 100             |
| Adenovirus 40/41 a/w human          | (No flow)                                                                                      | 3        | 6       | 33               | 67              |
| General Adenovirus a/w human        | -                                                                                              | -        | -       | -                | -               |
| F-RNA coliphage human               | All data                                                                                       | 5        | 109     | 4                | 96              |
| F-RNA coliphage human               | (Spring) AND (fall)                                                                            | 2        | 67      | 3                | 97              |
| F-RNA coliphage human               | (Summer) AND (RCA <sub>out</sub> \URCA <sub>in</sub> )                                         | 0        | 15      | 0                | 100             |
| F-RNA coliphage human               | (Summer) AND (RCA <sub>in</sub> ) AND (URCA <sub>out</sub> )                                   | 3        | 27      | 10               | 90              |
| F-RNA coliphage animal              | All data                                                                                       | 35       | 79      | 31               | 69              |
| F-RNA coliphage animal              | (Spring) AND (summer)                                                                          | 19       | 65      | 23               | 77              |
| F-RNA coliphage animal              | (Fall)                                                                                         | 16       | 14      | 53               | 47              |





| Microbial Source Tracking Endpoint | Estimate        | Cryptosporidium a/w |          |       |        |               |                 | Bacteroidales   |                |                 |            |              | Virus                 |                      |                        |                           |                         |                     |                         |                                    |                            |                                |                       |     |
|------------------------------------|-----------------|---------------------|----------|-------|--------|---------------|-----------------|-----------------|----------------|-----------------|------------|--------------|-----------------------|----------------------|------------------------|---------------------------|-------------------------|---------------------|-------------------------|------------------------------------|----------------------------|--------------------------------|-----------------------|-----|
|                                    |                 | livestock           | wildlife | avian | humans | muskrat/voles | unknown sources | ruminant marker | muskrat marker | C. goose marker | pig marker | human marker | Hepatitis A a/w human | Astrovirus a/w human | Norovirus GI a/w human | Norovirus GIII a/w bovine | Norovirus GIV a/w human | Sapovirus a/w human | Human Torque teno virus | Animal Torque teno virus a/w swine | Adenovirus 40/41 a/w human | Adenovirus General V a/w human | F-RNA coliphage human |     |
| Norovirus GI a/w human             | Lower 95% CI OR | 0.0                 | 0.0      | 0.0   | 0.0    | 0.0           | 0.0             | 0.5             | 0.0            | 0.1             | 0.2        | 0.3          | 0.2                   | 0.0                  |                        |                           |                         |                     |                         |                                    |                            |                                |                       |     |
|                                    | Odds Ratio      | 0.0                 | 0.0      | 0.0   | 0.0    | 0.0           | 0.0             | 2.1             | 0.0            | 3.5             | ∞          | 2.1          | ∞                     | 0.5                  |                        |                           |                         |                     |                         |                                    |                            |                                |                       |     |
|                                    | Upper 95% CI OR | 11.8                | 77.9     | ∞     | ∞      | ∞             | 77.9            | 8.4             | 4.1            | 72.6            | ∞          | 10.0         | ∞                     | 3.8                  |                        |                           |                         |                     |                         |                                    |                            |                                |                       |     |
| Norovirus GIII a/w bovine          | Lower 95% CI OR | 0.0                 | 0.0      | 0.0   | 0.0    | 0.0           | 0.0             | 0.1             | 0.0            | 0.0             | 0.0        | 0.2          | 0.0                   | 0.1                  | 0.1                    |                           |                         |                     |                         |                                    |                            |                                |                       |     |
|                                    | Odds Ratio      | 0.0                 | 0.0      | 0.0   | 0.0    | 0.0           | 0.0             | 0.9             | 1.3            | 0.0             | 0.0        | 1.6          | 0.0                   | 1.3                  | 1.5                    |                           |                         |                     |                         |                                    |                            |                                |                       |     |
|                                    | Upper 95% CI OR | ∞                   | ∞        | ∞     | ∞      | ∞             | ∞               | 5.0             | 12.5           | 23.4            | 352.9      | 9.7          | 310.5                 | 7.1                  | 8.8                    |                           |                         |                     |                         |                                    |                            |                                |                       |     |
| Norovirus GIV a/w human            | Lower 95% CI OR | 0.0                 | 0.0      | 0.0   | 0.0    | 0.0           | 0.0             | 0.0             | 0.0            | 0.0             | 0.0        | 0.0          | 0.0                   | 1.3                  | 0.0                    | 1.7                       |                         |                     |                         |                                    |                            |                                |                       |     |
|                                    | Odds Ratio      | 0.0                 | 0.0      | 0.0   | 0.0    | 0.0           | 0.0             | 0.5             | 0.0            | 0.0             | 0.0        | 1.0          | 0.0                   | 7.8                  | 1.0                    | 11.0                      |                         |                     |                         |                                    |                            |                                |                       |     |
|                                    | Upper 95% CI OR | ∞                   | ∞        | ∞     | ∞      | ∞             | ∞               | 4.4             | 9.0            | 35.8            | 519.5      | 9.7          | 483.8                 | 48.8                 | 9.4                    | 72.1                      |                         |                     |                         |                                    |                            |                                |                       |     |
| Sapovirus a/w human                | Lower 95% CI OR | 0.0                 | 0.0      | 0.0   | 0.0    | 0.0           | 0.0             | 0.0             | 0.0            | 0.0             | 0.0        | 0.0          | 0.0                   | 0.0                  | 0.0                    | 0.0                       | 0.0                     |                     |                         |                                    |                            |                                |                       |     |
|                                    | Odds Ratio      | 0.0                 | 0.0      | 0.0   | 0.0    | 0.0           | 0.0             | 0.0             | 0.0            | 0.0             | 0.0        | 0.0          | 0.0                   | 0.0                  | 0.0                    | 0.0                       | 0.0                     |                     |                         |                                    |                            |                                |                       |     |
|                                    | Upper 95% CI OR | ∞                   | ∞        | ∞     | ∞      | ∞             | ∞               | ∞               | ∞              | ∞               | ∞          | ∞            | ∞                     | ∞                    | ∞                      | ∞                         | ∞                       |                     |                         |                                    |                            |                                |                       |     |
| Human Torque teno virus            | Lower 95% CI OR | 0.0                 | 0.0      | 0.0   | 0.0    | 0.0           | 0.0             | 0.1             | 0.0            | 0.0             | 0.0        | 0.0          | 0.3                   | 0.2                  | 0.2                    | 0.6                       | 0.0                     | 0.0                 |                         |                                    |                            |                                |                       |     |
|                                    | Odds Ratio      | 0.0                 | 0.0      | 0.0   | 0.0    | 0.0           | 0.0             | 0.7             | 0.0            | 0.0             | 0.0        | 0.0          | ∞                     | 1.6                  | 2.0                    | 4.2                       | 1.4                     | 0.0                 |                         |                                    |                            |                                |                       |     |
|                                    | Upper 95% CI OR | ∞                   | ∞        | ∞     | ∞      | ∞             | ∞               | 4.1             | 5.7            | 23.4            | 352.9      | 2.8          | ∞                     | 9.5                  | 11.8                   | 22.7                      | 13.5                    | ∞                   |                         |                                    |                            |                                |                       |     |
| Torque teno sus virus a/w swine    | Lower 95% CI OR | 0.0                 | 0.0      | 0.0   | 0.0    | 0.0           | 0.0             | 0.1             | 0.0            | 0.0             | 0.0        | 0.0          | 0.3                   | 0.0                  | 0.5                    | 0.0                       | 0.0                     | 0.0                 | 0.2                     |                                    |                            |                                |                       |     |
|                                    | Odds Ratio      | 0.0                 | 0.0      | 0.0   | 0.0    | 0.0           | 0.0             | 1.0             | 0.0            | 0.0             | 0.0        | 0.7          | ∞                     | 0.7                  | 3.7                    | 0.0                       | 0.0                     | 0.0                 | 2.8                     |                                    |                            |                                |                       |     |
|                                    | Upper 95% CI OR | ∞                   | ∞        | ∞     | ∞      | ∞             | ∞               | 6.2             | 5.7            | 23.4            | 352.9      | 5.6          | ∞                     | 5.5                  | 19.8                   | 3.7                       | 6.2                     | ∞                   | 17.8                    |                                    |                            |                                |                       |     |
| Adenovirus 40/41 a/w human         | Lower 95% CI OR | 0.0                 | 0.0      | 0.0   | 0.0    | 0.0           | 0.0             | 0.0             | 0.0            | 0.0             | 0.0        | 0.0          | 0.0                   | 0.0                  | 0.0                    | 0.0                       | 0.0                     | 0.0                 | 0.0                     | 0.1                                |                            |                                |                       |     |
|                                    | Odds Ratio      | 0.0                 | 0.0      | 0.0   | 0.0    | 0.0           | 0.0             | 1.5             | 0.0            | 0.0             | 0.0        | 2.1          | 0.0                   | 0.0                  | 0.0                    | 0.0                       | 0.0                     | 0.0                 | 3.5                     |                                    |                            |                                |                       |     |
|                                    | Upper 95% CI OR | ∞                   | ∞        | ∞     | ∞      | ∞             | ∞               | 30.8            | 19.5           | 71.4            | 932.0      | 29.0         | 998.2                 | 9.8                  | 11.6                   | 12.8                      | 21.0                    | ∞                   | 16.0                    | 48.5                               |                            |                                |                       |     |
| General Adenovirus V a/w human     | Lower 95% CI OR | 0.0                 | 0.0      | 0.0   | 0.0    | 0.0           | 0.0             | 0.0             | 0.0            | 0.0             | 0.0        | 0.0          | 0.0                   | 0.0                  | 0.0                    | 0.0                       | 0.0                     | 0.0                 | 0.0                     | 0.0                                | 0.3                        |                                |                       |     |
|                                    | Odds Ratio      | 0.0                 | 0.0      | 0.0   | 0.0    | 0.0           | 0.0             | 3.1             | 0.0            | 0.0             | 0.0        | 0.0          | 0.0                   | 0.0                  | 0.0                    | 0.0                       | 0.0                     | 0.0                 | 0.0                     | 29.9                               |                            |                                |                       |     |
|                                    | Upper 95% CI OR | ∞                   | ∞        | ∞     | ∞      | ∞             | ∞               | 248.5           | 65.0           | 204.8           | 1874.0     | 33.9         | 2002.4                | 33.8                 | 40.0                   | 43.9                      | 69.9                    | ∞                   | 54.2                    | 54.2                               | 2639.1                     |                                |                       |     |
| F-RNA coliphage human              | Lower 95% CI OR | 0.0                 | 0.0      | 0.0   | 0.0    | 0.0           | 0.0             | 0.1             | 0.1            | 0.0             | 0.0        | 0.0          | 0.0                   | 0.2                  | 0.0                    | 0.0                       | 0.0                     | 0.0                 | 0.0                     | 0.0                                | 0.0                        | 0.0                            | 0.0                   | 0.0 |
|                                    | Odds Ratio      | 0.0                 | 0.0      | 0.0   | 0.0    | 0.0           | 0.0             | 1.2             | 3.1            | 0.0             | 0.0        | 1.6          | 0.0                   | 2.5                  | 1.3                    | 1.4                       | 2.1                     | 0.0                 | 1.6                     | 1.8                                | 0.0                        | 0.0                            | 0.0                   | 0.0 |
|                                    | Upper 95% CI OR | ∞                   | ∞        | ∞     | ∞      | ∞             | ∞               | 8.1             | 32.3           | 25.2            | 53.6       | 15.1         | 530.4                 | 17.5                 | 12.3                   | 13.8                      | 21.8                    | ∞                   | 15.8                    | 18.4                               | 23.4                       | 77.3                           |                       |     |
| F-RNA coliphage animal             | Lower 95% CI OR | 0.0                 | 0.0      | 0.0   | 0.0    | 0.0           | 0.0             | 0.3             | 0.5            | 0.4             | 0.0        | 0.8          | 0.0                   | 0.2                  | 0.0                    | 1.0                       | 0.5                     | 0.0                 | 0.1                     | 0.0                                | 0.0                        | 0.0                            | 0.0                   | 0.4 |
|                                    | Odds Ratio      | 2.0                 | 1.0      | 0.0   | 0.0    | 0.0           | 0.0             | 0.8             | 2.7            | 4.1             | 0.0        | 2.9          | 0.0                   | 0.7                  | 0.3                    | 4.7                       | 2.7                     | 0.0                 | 0.6                     | 0.4                                | 0.0                        | 0.0                            | 0.0                   | 2.5 |
|                                    | Upper 95% CI OR | 43.8                | 21.5     | 387.6 | 61.7   | 9.5           | 15.1            | 2.1             | 15.5           | 50.3            | 6.3        | 10.4         | 58.9                  | 2.6                  | 1.4                    | 29.3                      | 18.5                    | ∞                   | 2.9                     | 2.3                                | 2.3                        | 8.1                            | 14.2                  |     |



Supplementary Table 5C: Fisher's exact test p-values for co-occurrence of microbial source tracking endpoints for AAD. Significant results ( $p < 0.05$ ) bolded. A/w, associated with.

|                                            | <i>Cryptosporidium a/w</i> |                 |       |        |               |                 | <i>Bacteroidales</i> |                |                 |            |              | Virus                 |                      |                        |                           |                         |                     |                         |                                 |                            |                              |                       |  |
|--------------------------------------------|----------------------------|-----------------|-------|--------|---------------|-----------------|----------------------|----------------|-----------------|------------|--------------|-----------------------|----------------------|------------------------|---------------------------|-------------------------|---------------------|-------------------------|---------------------------------|----------------------------|------------------------------|-----------------------|--|
|                                            | livestock                  | wildlife        | avian | humans | muskrat/voles | unknown sources | ruminant marker      | muskrat marker | C. goose marker | pig marker | human marker | Hepatitis A a/w human | Astrovirus a/w human | Norovirus GI a/w human | Norovirus GIII a/w bovine | Norovirus GIV a/w human | Sapovirus a/w human | Human Torque teno virus | Torque teno sus virus a/w swine | Adenovirus 40/41 a/w human | General Adenovirus a/w human | F-RNA coliphage human |  |
| <i>Cryptosporidium a/w</i> wildlife        | 0.051                      |                 |       |        |               |                 |                      |                |                 |            |              |                       |                      |                        |                           |                         |                     |                         |                                 |                            |                              |                       |  |
| <i>Cryptosporidium a/w</i> avian           | 0.411                      | 0.044           |       |        |               |                 |                      |                |                 |            |              |                       |                      |                        |                           |                         |                     |                         |                                 |                            |                              |                       |  |
| <i>Cryptosporidium a/w</i> humans          | 1.000                      | 0.536           | 1.000 |        |               |                 |                      |                |                 |            |              |                       |                      |                        |                           |                         |                     |                         |                                 |                            |                              |                       |  |
| <i>Cryptosporidium a/w</i> muskrat/voles   | 0.072                      | <b>2.20E-16</b> | 0.019 | 1.000  |               |                 |                      |                |                 |            |              |                       |                      |                        |                           |                         |                     |                         |                                 |                            |                              |                       |  |
| <i>Cryptosporidium a/w</i> unknown sources | <b>0.023</b>               | <b>1.23E-06</b> | 1.000 | 1.000  | <b>0.017</b>  |                 |                      |                |                 |            |              |                       |                      |                        |                           |                         |                     |                         |                                 |                            |                              |                       |  |
| <i>Bacteroidales</i> ruminant marker       | 0.467                      | 0.583           | 1.000 | 0.422  | 0.339         | 1.000           |                      |                |                 |            |              |                       |                      |                        |                           |                         |                     |                         |                                 |                            |                              |                       |  |
| <i>Bacteroidales</i> muskrat marker        | 1.000                      | 0.551           | 1.000 | 1.000  | 1.000         | 1.000           | 0.128                |                |                 |            |              |                       |                      |                        |                           |                         |                     |                         |                                 |                            |                              |                       |  |
| <i>Bacteroidales</i> C. goose marker       | 1.000                      | 1.000           | 1.000 | 1.000  | 1.000         | 1.000           | <b>0.045</b>         | 0.178          |                 |            |              |                       |                      |                        |                           |                         |                     |                         |                                 |                            |                              |                       |  |
| <i>Bacteroidales</i> pig marker            | 0.096                      | 0.579           | 0.094 | 1.000  | 0.181         | 0.299           | 0.051                | 0.441          | 0.397           |            |              |                       |                      |                        |                           |                         |                     |                         |                                 |                            |                              |                       |  |
| <i>Bacteroidales</i> human marker          | 1.000                      | 1.000           | 1.000 | 1.000  | 0.687         | 0.587           | 1.000                | 0.180          | 0.143           | 0.606      |              |                       |                      |                        |                           |                         |                     |                         |                                 |                            |                              |                       |  |
| Hepatitis A a/w human                      | 1.000                      | 1.000           | 1.000 | 1.000  | 1.000         | 1.000           | 0.247                | 1.000          | 1.000           | 1.000      | 1.000        |                       |                      |                        |                           |                         |                     |                         |                                 |                            |                              |                       |  |
| Astrovirus a/w human                       | 0.333                      | 0.167           | 1.000 | 1.000  | 1.000         | 0.167           | 0.506                | 0.355          | 1.000           | 1.000      | 0.685        | 1.000                 |                      |                        |                           |                         |                     |                         |                                 |                            |                              |                       |  |
| Norovirus GI a/w human                     | 0.467                      | 1.000           | 1.000 | 1.000  | 1.000         | 1.000           | 0.298                | 0.592          | 0.342           | 0.129      | 0.384        | 0.120                 | 0.689                |                        |                           |                         |                     |                         |                                 |                            |                              |                       |  |
| Norovirus GIII a/w bovine                  | 1.000                      | 1.000           | 1.000 | 1.000  | 1.000         | 1.000           | 1.000                | 0.580          | 1.000           | 1.000      | 0.626        | 1.000                 | 0.672                | 0.636                  |                           |                         |                     |                         |                                 |                            |                              |                       |  |
| Norovirus GIV a/w human                    | 1.000                      | 1.000           | 1.000 | 1.000  | 1.000         | 1.000           | 0.677                | 1.000          | 1.000           | 1.000      | 1.000        | <b>0.012</b>          | 1.000                | <b>0.005</b>           |                           |                         |                     |                         |                                 |                            |                              |                       |  |
| Sapovirus a/w human                        | 1.000                      | 1.000           | 1.000 | 1.000  | 1.000         | 1.000           | 1.000                | 1.000          | 1.000           | 1.000      | 1.000        | 1.000                 | 1.000                | 1.000                  | 1.000                     |                         |                     |                         |                                 |                            |                              |                       |  |
| Human Torque teno virus                    | 1.000                      | 1.000           | 1.000 | 1.000  | 1.000         | 1.000           | 1.000                | 1.000          | 1.000           | 1.000      | 0.350        | 0.093                 | 0.627                | 0.345                  | 0.081                     | 0.553                   | 1.000               |                         |                                 |                            |                              |                       |  |
| Torque teno sus virus a/w swine            | 1.000                      | 1.000           | 1.000 | 1.000  | 1.000         | 1.000           | 1.000                | 1.000          | 1.000           | 1.000      | 1.000        | 0.093                 | 1.000                | 0.100                  | 0.598                     | 1.000                   | 1.000               | 0.232                   |                                 |                            |                              |                       |  |
| Adenovirus 40/41 a/w human                 | 1.000                      | 1.000           | 1.000 | 1.000  | 1.000         | 1.000           | 1.000                | 1.000          | 1.000           | 1.000      | 0.455        | 1.000                 | 1.000                | 1.000                  | 1.000                     | 1.000                   | 1.000               | 1.000                   | 0.326                           |                            |                              |                       |  |
| General Adenovirus a/w human               | 1.000                      | 1.000           | 1.000 | 1.000  | 1.000         | 1.000           | 0.436                | 1.000          | 1.000           | 1.000      | 1.000        | 1.000                 | 1.000                | 1.000                  | 1.000                     | 1.000                   | 1.000               | 1.000                   | 1.000                           | 0.073                      |                              |                       |  |
| F-RNA coliphage human                      | 1.000                      | 1.000           | 1.000 | 1.000  | 1.000         | 1.000           | 0.680                | 0.330          | 1.000           | 1.000      | 0.511        | 1.000                 | 0.269                | 0.592                  | 0.558                     | 0.442                   | 1.000               | 0.522                   | 0.483                           | 1.000                      | 1.000                        |                       |  |
| F-RNA coliphage animal                     | 0.524                      | 1.000           | 1.000 | 1.000  | 1.000         | 1.000           | 0.830                | 0.219          | 0.133           | 0.560      | 0.064        | 1.000                 | 0.777                | 0.118                  | <b>0.024</b>              | 0.260                   | 1.000               | 0.736                   | 0.311                           | 0.149                      | 0.516                        | 0.235                 |  |
